# Supplementary material for: Leveraging Deep Learning for Fine-Grained Categorization of Parkinson’s Disease Progression Levels through Analysis of Vocal Acoustic Patterns
Source: MDPI journal article supplement (doi:10.3390/bioengineering11030295), 2024-03-21
Supplement: s1 [file s1]

# Supplementary Information

## Leveraging Deep Learning for Fine-Grained Categorization of Parkinson's Disease Progression Levels through Analysis of Vocal Acoustic Patterns

Hadi Sedigh Malekroodi <sup>1</sup>, Nuwan Madusanka <sup>2</sup>, Byeong-il Lee <sup>1,2,3,\*</sup> and Myunggi Yi <sup>1,2,3,\*</sup>

<sup>1</sup> Industry 4.0 Convergence Bionics Engineering, Pukyong National University, Busan 48513, Republic of Korea; hadi\_sedigh@pukyong.ac.kr

<sup>2</sup> Digital of Healthcare Research Center, Institute of Information Technology and Convergence, Pukyong National University, Busan 48513, Republic of Korea; nuwanmadusanka@hotmail.com

<sup>3</sup> Division of Smart Healthcare, Pukyong National University, Busan 48513, Republic of Korea

\* Correspondence: bilee@pknu.ac.kr (B.-i.L.); myunggi@pknu.ac.kr (M.Y.)

Supplementary materials include:

**Table S1.** Details of modified dataset.

| Len. of audio post-seg.                 | Vowels                  | PD_early | PD_Adv. | HC   | Total |
|-----------------------------------------|-------------------------|----------|---------|------|-------|
| FS1 and FS-5<br>(only first 1 or 5-sec) | /a/, /e/, /i/, /o/, /u/ | 160      | 115     | 200  | 475   |
|                                         | Each vowel by itself    | 32       | 23      | 40   | 95    |
| AS-1 (1-sec segmentation)               | /a/, /e/, /i/, /o/, /u/ | 3722     | 1817    | 3536 | 9075  |
|                                         | /a/                     | 746      | 360     | 681  | 1787  |
|                                         | /e/                     | 719      | 356     | 701  | 1776  |
|                                         | /i/                     | 760      | 387     | 711  | 1858  |
|                                         | /o/                     | 770      | 358     | 700  | 1828  |
|                                         | /u/                     | 727      | 356     | 743  | 1826  |
|                                         |                         |          |         |      |       |
| AS-5 (5-sec segmentation)               | /a/, /e/, /i/, /o/, /u/ | 529      | 244     | 473  | 1246  |
|                                         | /a/                     | 103      | 49      | 89   | 241   |
|                                         | /e/                     | 101      | 48      | 93   | 242   |
|                                         | /i/                     | 112      | 52      | 96   | 260   |
|                                         | /o/                     | 109      | 46      | 94   | 249   |
|                                         | /u/                     | 104      | 49      | 101  | 254   |

**Table S2.** Comparison of performance (mean  $\pm$  SD) with additional two recent models using the FS-5 datasets. The table compares precision, recall, F1-score, and accuracy across models.

| FS datasets |           |            | Models                           |                                  |                   |                                  |                                  |
|-------------|-----------|------------|----------------------------------|----------------------------------|-------------------|----------------------------------|----------------------------------|
|             |           | Metric (%) | VGG16                            | VGG19                            | Dense121          | Eff_b0                           | Swin_s                           |
| 5 sec       | HC        | Precision  | 96.67 $\pm$ 4.71                 | 96.67 $\pm$ 4.71                 | 96.67 $\pm$ 4.71  | 96.67 $\pm$ 4.71                 | <b>97.00<math>\pm</math>4.24</b> |
|             |           | Recall     | 99.67 $\pm$ 0.47                 | 99.33 $\pm$ 0.94                 | 99 $\pm$ 1.41     | <b>100<math>\pm</math>0</b>      | <b>100.00<math>\pm</math>0</b>   |
|             |           | F1 score   | 98.00 $\pm$ 2.83                 | 98.00 $\pm$ 2.16                 | 97.67 $\pm$ 2.05  | <b>98.33<math>\pm</math>2.36</b> | <b>98.33<math>\pm</math>2.36</b> |
|             | PD_Mild   | Precision  | 91.00 $\pm$ 6.38                 | <b>92<math>\pm</math>3.56</b>    | 76 $\pm$ 2.94     | 79.67 $\pm$ 9.03                 | 88.67 $\pm$ 7.72                 |
|             |           | Recall     | 82.67 $\pm$ 8.06                 | 73.00 $\pm$ 3.74                 | 79.33 $\pm$ 16.44 | 79.33 $\pm$ 6.6                  | 74 $\pm$ 22.45                   |
|             |           | F1 score   | <b>86.00<math>\pm</math>1.63</b> | 81.00 $\pm$ 3.56                 | 76.67 $\pm$ 9.29  | 79.67 $\pm$ 7.76                 | 77.67 $\pm$ 12.5                 |
|             | PD_Severe | Precision  | 84.67 $\pm$ 8.96                 | 75.33 $\pm$ 4.5                  | 78 $\pm$ 12.73    | 76.33 $\pm$ 8.38                 | 77.67 $\pm$ 13.27                |
|             |           | Recall     | <b>88.67<math>\pm</math>9.74</b> | <b>92.33<math>\pm</math>3.09</b> | 67.67 $\pm$ 4.19  | 71.33 $\pm$ 12.76                | 83.67 $\pm$ 13.6                 |
|             |           | F1 score   | <b>85.67<math>\pm</math>5.91</b> | 82.67 $\pm$ 1.89                 | 72 $\pm$ 2.94     | 73.33 $\pm$ 8.96                 | 78.33 $\pm$ 0.47                 |
|             |           | Accuracy   | <b>91.15<math>\pm</math>0.64</b> | 88.84 $\pm$ 1.54                 | 84.8 $\pm$ 44.09  | 86.09 $\pm$ 8.22                 | 87.39 $\pm$ 3.92                 |

AS-1 dataset after major voting (Accuracy [%])

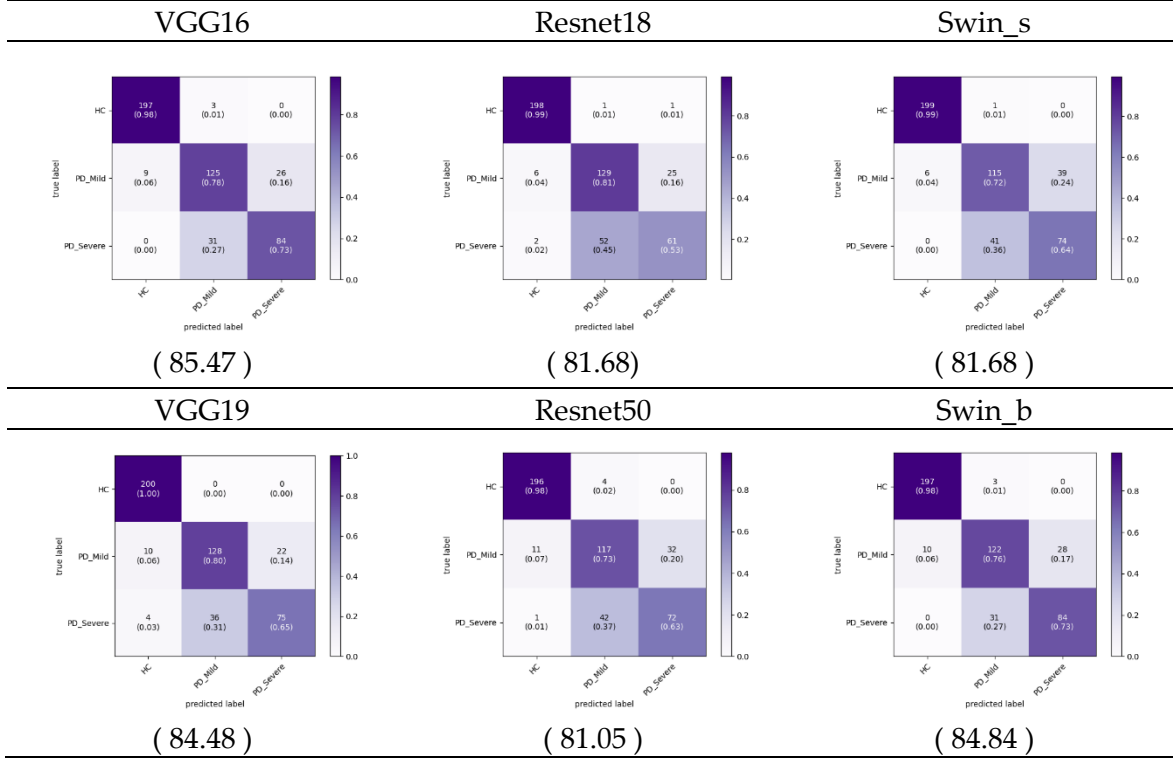

**Figure S1.** Cumulative confusion matrix for each model after applying majority voting to predictions on the AS-1 dataset.

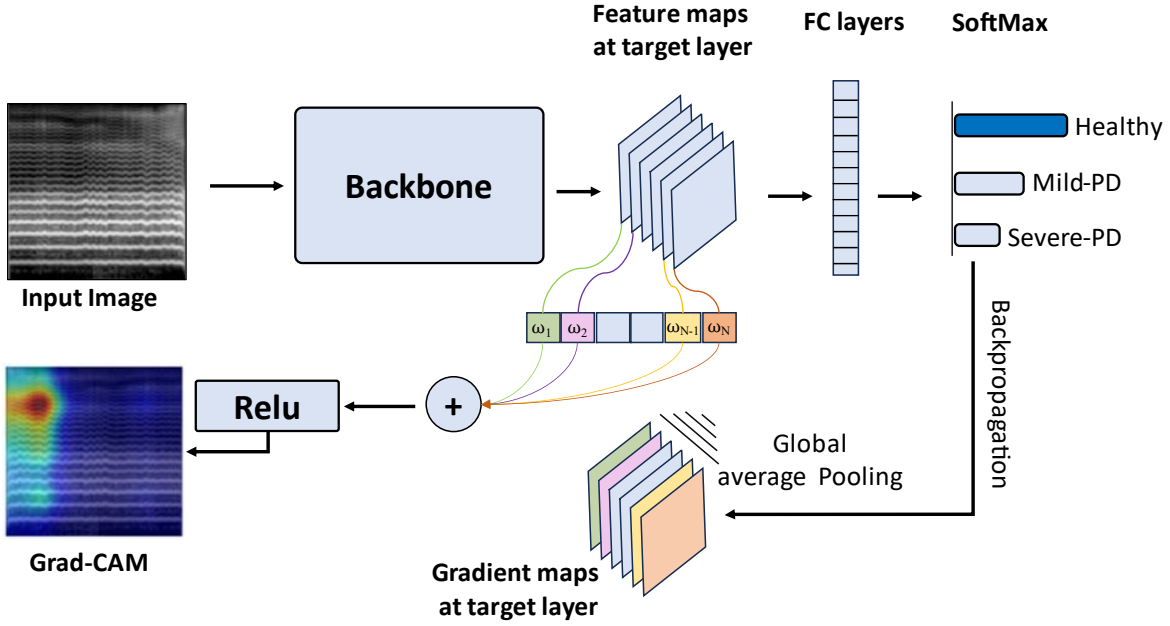

**Figure S2.** Architecture of Grad-CAM. An input image is fed through a trained convolutional neural network, which produces a classification result. Backpropagation is then performed to obtain the gradient of the classification score with respect to the feature maps of the last convolutional layer. The gradients are global-average-pooled to obtain weights that represent the importance of each feature map channel. The weighted combination of feature maps is passed through a ReLU activation to produce a coarse localization heatmap highlighting the relevant image regions for the predicted class [1]. Warmer colors like yellow, green, and especially red highlight regions that strongly activate the model in making its predictions. Meanwhile, cooler blue tones point to areas that have little effect on the model’s reasoning. So, the overlay makes it possible to interpret which input regions contain features that are most contributory versus negligible for the model’s inference on a given input image [1,2].

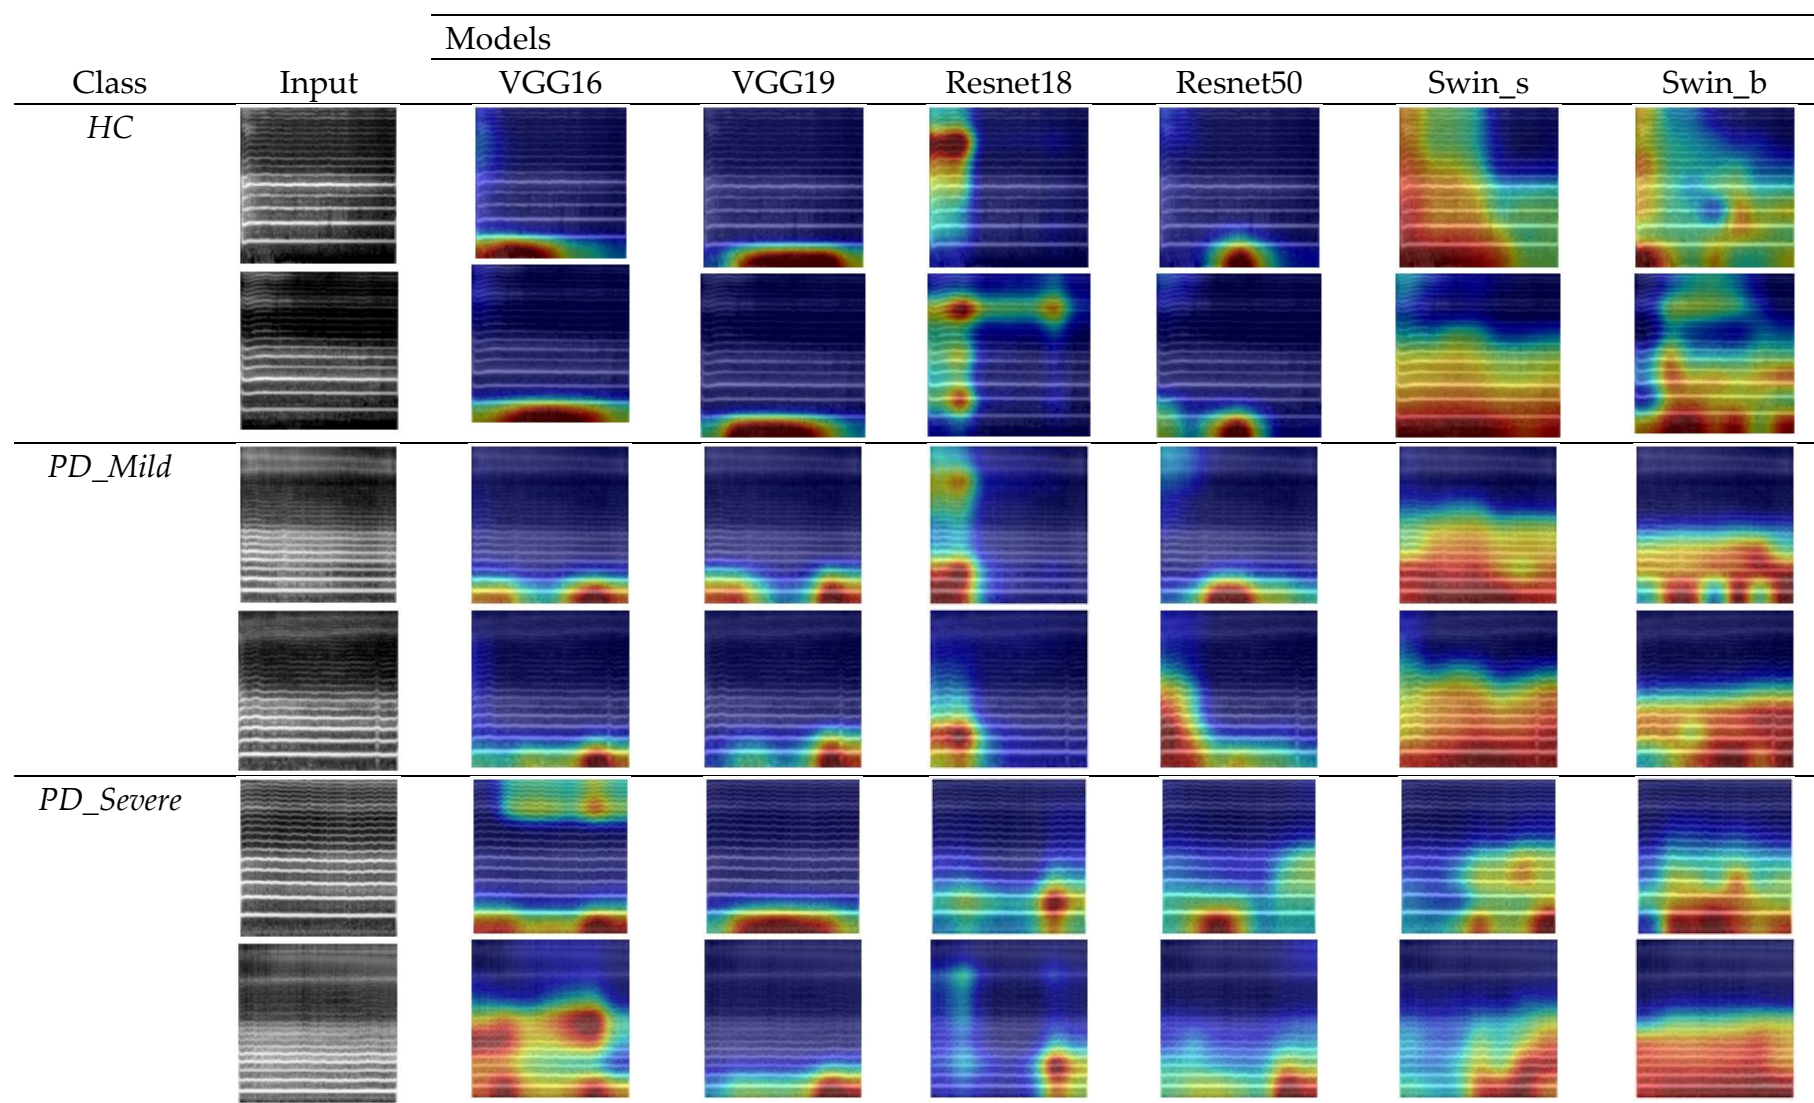

**Figure S3.** Grad-CAM visualization features different models across various classes for specific vowel /o/.

## Reference

1. Mellak, Y., et al., *A machine learning framework for the quantification of experimental uveitis in murine OCT*. Biomedical Optics Express, 2023. **14**(7): p. 3413-3432.
2. Lal, K.N., *A lung sound recognition model to diagnoses the respiratory diseases by using transfer learning*. Multimedia Tools and Applications, 2023. **82**(23): p. 36615-36631.
